# Supplementary material for: Age-specific clinical features and prognostic risk factors in pediatric ITP: A single-center retrospective cohort study of 966 cases
Source: Research Square preprint supplement (doi:10.21203/rs.3.rs-8497619/v1), 2026-01-16
Supplement: Supplementary file 1 [file 3de7ab851d28691a8e5139cf.docx]

**Table S1. Baseline clinical characteristics of ITP patients by different age group.**

| **Category** | **infancy** | **todderhood** | **Preschool age** | **school age** | **adolescence** | **P value** |
| --- | --- | --- | --- | --- | --- | --- |
| Gender |  |  |  |  |  |  |
| male | 178  (31.7%) | 149  (26.5%) | 112  (19.9%) | 106  (18.9%) | 17  (3%) | 0.057 |
| female | 125  (30.9%) | 81  (20%) | 82  (20.3%) | 96  (23.8%) | 20  (5%) |  |
| initial PLT counts |  |  |  |  |  |  |
| PLT counts <10 ×10⁹/L | 189  (31.2%) | 134  (22.1%) | 116  (19.1%) | 139  (22.9%) | 28  (4.6%) | 0.074 |
| PLT counts ≥10 ×10⁹/L | 114  (31.7%) | 96  (26.7%) | 78  (21.7%) | 63  (17.5%) | 9  (2.5%) |  |
| IVIG status |  |  |  |  |  |  |
| No IVIG | 194  (30.6%) | 156  (24.6%) | 129  (20.4%) | 133  (21.0%) | 21  （3.3%） | 0.71 |
| IVIG  administered | 109 (32.7%) | 74  (22.2%) | 65  (19.5%) | 69  (20.7%) | 16  (4.8%) |  |
| GC taper time |  |  |  |  |  |  |
| ≤7 days | 44  (35.8%) | 25  (20.3%) | 21  (17.1%) | 23  (18.7%) | 10  (8.1%) | 0.053 |
| >7 days | 259  (30.7%) | 205  (24.3%) | 173  (20.5%) | 179  (21.2%) | 27  (3.2%) |  |
| Trigger factors |  |  |  |  |  | <0.001 |
| no obvious cause | 171  (24.4%) | 173  (24.6%) | 154  (21.9%) | 173  (24.6%) | 31  (4.4%) |  |
| vaccination | 92  (67.6%) | 27  (19.9%) | 9  (6.6%) | 8  (5.9%) | 0  (0.0%) |  |
| viral infection | 33  (28.4%) | 29  (25.0%) | 27  (23.3%) | 21  (18.1%) | 6  (5.2%) |  |
| vaccination+viral infection | 7  (58.3%) | 1  (8.3%) | 4  (33.3%) | 0  (0.0%) | 0  (0.0%) |  |
| bleeding score |  |  |  |  |  | <0.001 |
| score 1 | 103  (26.8%) | 104  (27.1%) | 77  (20.1%) | 83  (21.6%) | 17  (4.4%) |  |
| score 2 | 180  (38.6%) | 107  (23.0%) | 88  (18.9%) | 77  (16.5%) | 14  (3.0%) |  |
| score 3 | 4  (10.3%) | 10  (25.6%) | 6  (15.4%) | 17  (43.6%) | 2  (5.1%) |  |
| score 5 | 0  (0.0%) | 6  (14.3%) | 17  (40.5%) | 16  (38.1%) | 3  (7.1%) |  |
| score 8 | 16  (45.7%) | 3  (8.6%) | 6  (17.1%) | 9  (25.7%) | 1  (2.9%) |  |
| Diagnostic type |  |  |  |  |  | 0.003 |
| newly diagnosed ITP | 282  (33.2%) | 206  (24.3%) | 166  (19.6%) | 167  (19.7%) | 28  (3.3%) |  |
| persistent ITP | 16  (21.1%) | 14  (18.4%) | 16  (21.1%) | 25  (32.9%) | 5  (6.6%) |  |
| chronic ITP | 5  (12.2%) | 10  (24.4%) | 12  (29.3%) | 10  (24.4%) | 4  (9.8%) |  |
| efficacy |  |  |  |  |  | <0.001 |
| effectiveness | 288  (33.7%) | 204  (23.9%) | 170  (19.9%) | 159  (18.6%) | 33  (3.9%) |  |
| ineffectiveness | 15  (13.4%) | 26  (23.2%) | 24  (21.4%) | 43  (38.4%) | 4  (3.6%) |  |

**Abbreviations:Platelet:PLT, Intravenous immunoglobulin: IVIG, G**lucocorticoid:GC.

**Table S2. Association of treatment response duration with long-term prognostic types in ITP.**

|  | Long-term prognosis | | |  |  |  |  |  |
| --- | --- | --- | --- | --- | --- | --- | --- | --- |
|  | Newly diagnosed ITP | Persistent ITP | Chronic ITP | Total | X2 | P value | X2 | P value |
| ineffectiveness≤28d | 16 | 0 | 0 | 16 | 24.89 | <0.001 |  |  |
| ineffectiveness>28d | 32 | 36 | 28 | 96 | 27.66 <0.001 | |
| effectiveness≤28d | 162 | 0 | 1 | 163 | 11.20 | 0.004 |
| effectiveness>28d | 639 | 40 | 12 | 691 |  |  |


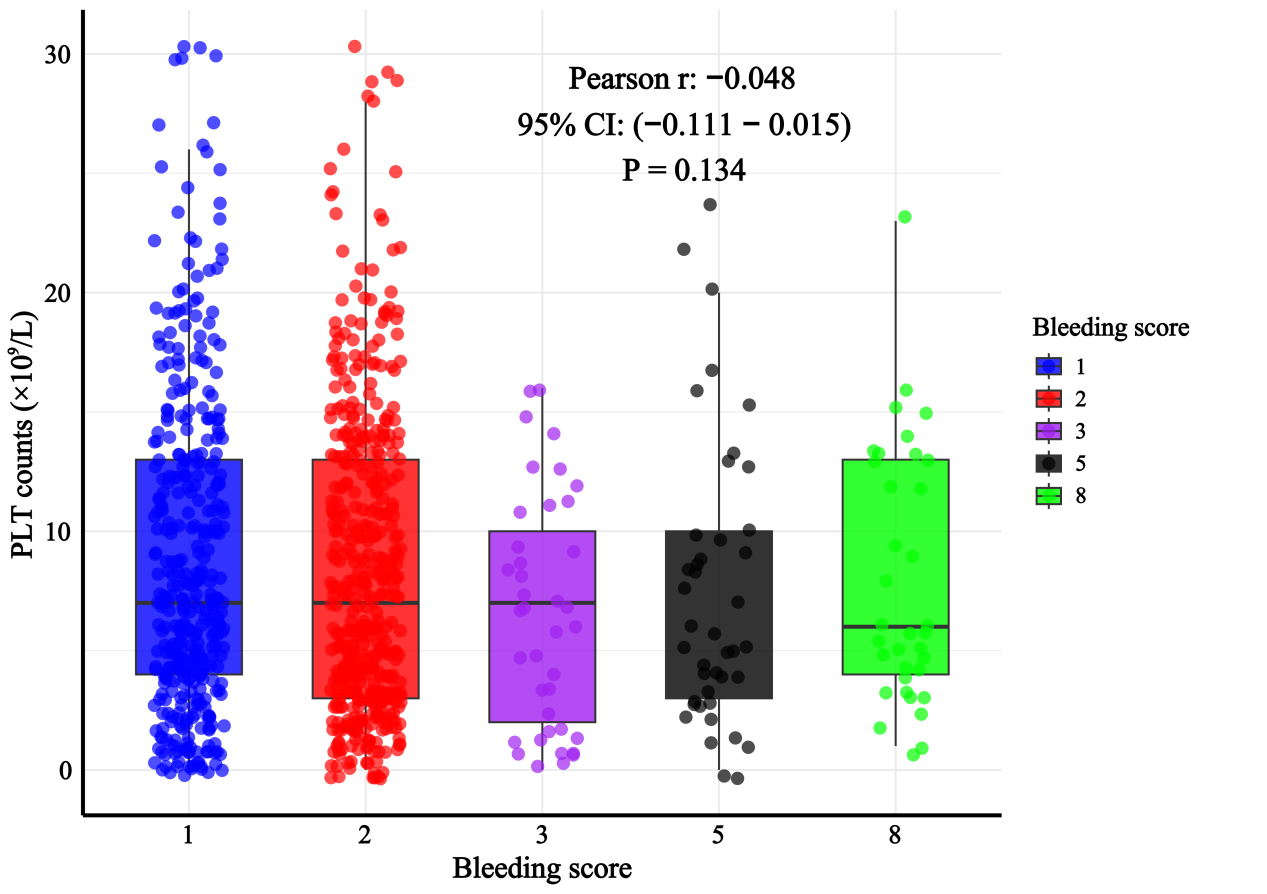


**Figure S1. The relationship between initial platelet counts at diagnosis and bleeding score.**


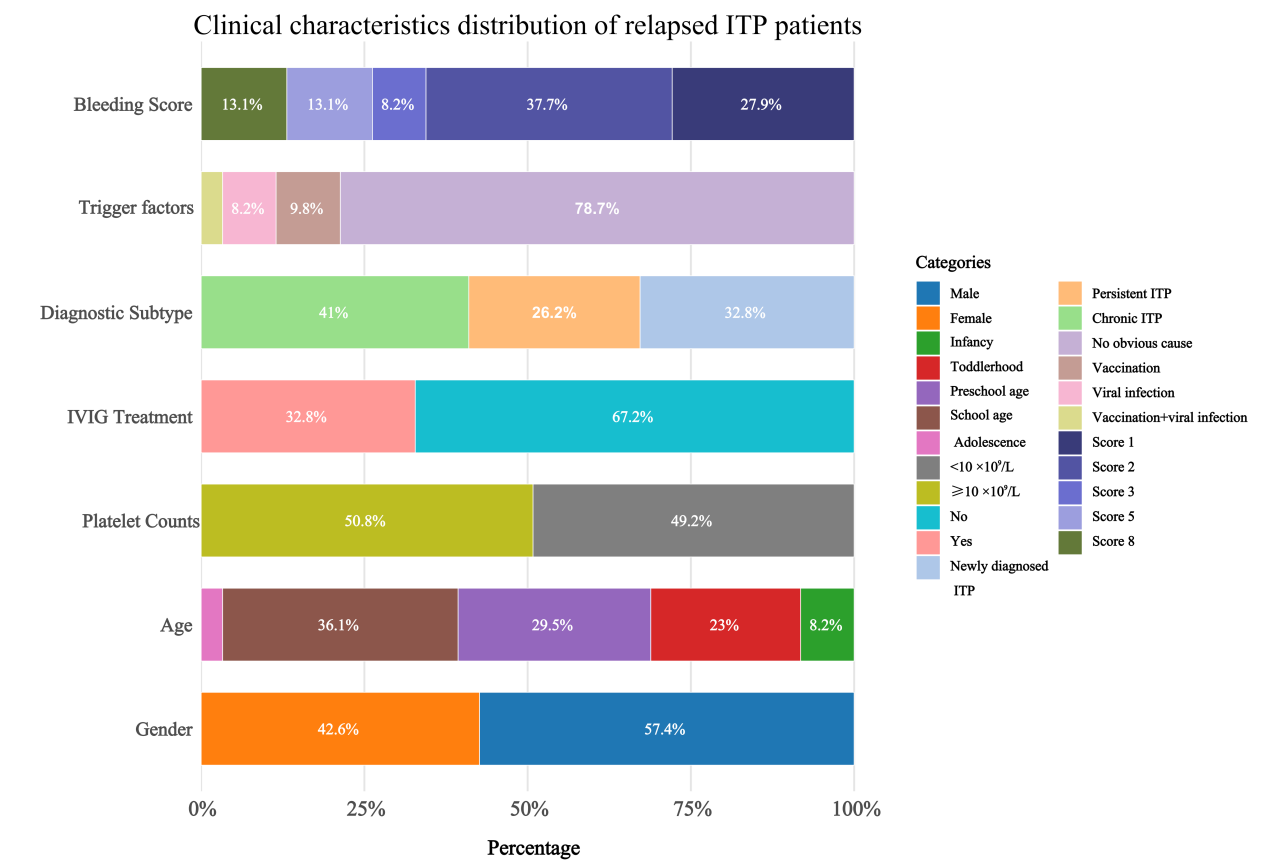


**Figure S2. Clinical features distribution of relapsed pediatric ITP patients.**

The stacked bar chart summarizes the proportion of characteristic among relapsed pediatric ITP patients. Data represent percentage distributions of each characteristic among relapsed patients. Categories are defined as follows: Bleeding score: score 1(27.9%), score 2 (37.7%), score 3 (8.2%), score 5 (13.1%) and score 8 (13.1%). Trigger factors: no obvious causes (78.7%), vaccination (9.8%), and viral infection (8.2%). Diagnostic subtype: chronic ITP (41%), persistent (26.2%) and newly diagnostic ITP (32.8%). IVIG treatment: No (67.2%) and yes (32.8%). Platelet count: ≥10 ×10⁹/L (50.8%) and <10 ×10⁹/L (49.2%). Age: 72≤age<144 m (36.1%), 36≤age<72 m (29.5%), 12≤age<36 m (23%), and 0≤age<12 m (8.2%). Gender: female (42.6%) and male (57.4%).
